# Supplementary material for: A series of ultrasensitive electrocatalysts Fe-MOF/MWCNTs for fentanyl determination
Source: Royal Society of Chemistry journal article supplement (doi:10.1039/d3an00156c), 2023-01-01
Supplement: d3an00156c1.pdf [file d3an00156c1.pdf]

## Supporting Information

### A Serial of Ultrasensitive Electrocatalysts Fe-MOF/MWCNTs for Fentanyl Determination

Zhidong Zhao <sup>abc</sup>, Yuan He <sup>ad</sup>, Xingrui Qi <sup>ab</sup>, Nian Li <sup>ab</sup>, Zijian He <sup>ab</sup>,

Yufang Chen <sup>abdefg</sup>, Tao Jin <sup>\*abdefg</sup>

<sup>a</sup> Guangzhou Institute of Chemistry, Chinese Academy of Sciences, 510650, Guangzhou, P. R. China

<sup>b</sup> University of Chinese Academy of Sciences, 100000, Beijing, P. R. China

<sup>c</sup> Guizhou Police College, 550005, Guiyang, P. R. China

<sup>d</sup> CAS Testing Technical Services (Guangzhou) Co. Ltd., 510650, Guangzhou, P. R. China

<sup>e</sup> CAS Engineering Laboratory for Special Fine Chemicals, Chinese Academy of Sciences, Guangzhou 510650, P. R. China

<sup>f</sup> CASH GCC Shaoguan Research Institute of Advanced Materials, Nanxiong 512400, China

<sup>g</sup> CASH GCC (Nanxiong) Research Institute of Advanced Materials Co., Ltd., Nanxiong 512400, China

Corresponding Author Email: jintao@gic.ac.cn.

#### Synthesis of the five Fe-MOFs

Preparation of Fe-MOF-235 : H<sub>2</sub>BDC (1.23 mmol) was added to 60 mL DMF and stirred for 10 min to form a clear solution. Then FeCl<sub>3</sub>·6H<sub>2</sub>O (0.738 mmol) was added to the solution and stirred for 5 min. The reactant mixture of 30 mL and 30 mL of ethanol were loaded into a Teflon-lined autoclave, heated at 80 °C for 24 h. After cooling to room temperature, the product was collected by centrifugation, washed several times each with ethanol and DMF, and dried at 60 °C for 12 h in a vacuum.<sup>[1]</sup>

Preparation of Fe-MIL-88B : FeCl<sub>3</sub>·6H<sub>2</sub>O (1 mmol) and H<sub>2</sub>BDC (1 mmol) were dissolved in a mixed solution of DMF (5 mL) and NaOH (2 M, 0.4 mL). After stirring for 30 minutes, the mixture was transferred to a Teflon-lined stainless steel autoclave, heated at 100 °C for 12 h. After cooling to room temperature, the product was collected by centrifugation, washed many times each with ethanol and DMF, and dried at 60 °C for 12 h in a vacuum.<sup>[2]</sup>

Preparation of Fe-MIL-53 : FeCl<sub>3</sub>·6H<sub>2</sub>O (5 mmol) and H<sub>2</sub>BDC (5 mmol) were dissolved in DMF (25 mL) and stirred for 30 min. The mixture was transferred to a Teflon-lined stainless steel autoclave, heated at 150 °C for 15 h. After cooling to room temperature, the product was collected by centrifugation, washed several times each with ethanol and DMF, and dried at 60 °C for 12 h in a vacuum.<sup>[3]</sup>

Preparation of Fe-MIL-68 : FeCl<sub>3</sub>·6H<sub>2</sub>O (1 mmol) and H<sub>2</sub>BDC (2 mmol) were dissolved into DMF (12 mL). Then HF (5 M, 120 μL) and HCl (1 M, 120 μL) were added to the above solution. After stirring for 30 minutes, the mixture was transferred to a Teflon-lined stainless steel autoclave, heated at 100 °C for 120 h. After cooling to room temperature, the product was

collected by centrifugation, washed many times each with deionized water and acetone, and dried at 60 °C for 12 h in a vacuum.<sup>[4]</sup>

Preparation of Fe-MIL-101 :  $\text{FeCl}_3 \cdot 6\text{H}_2\text{O}$  (2.45 mmol) and  $\text{H}_2\text{BDC}$  (1.24 mmol) were added to DMF (15 mL) and stirred for 30 min. The mixture was transferred to a Teflon-lined stainless steel autoclave, heated at 110 °C for 24 h. After cooling to room temperature, the product was collected by centrifugation, washed several times each with ethanol and DMF, and dried at 60 °C for 12 h in a vacuum.<sup>[5]</sup>

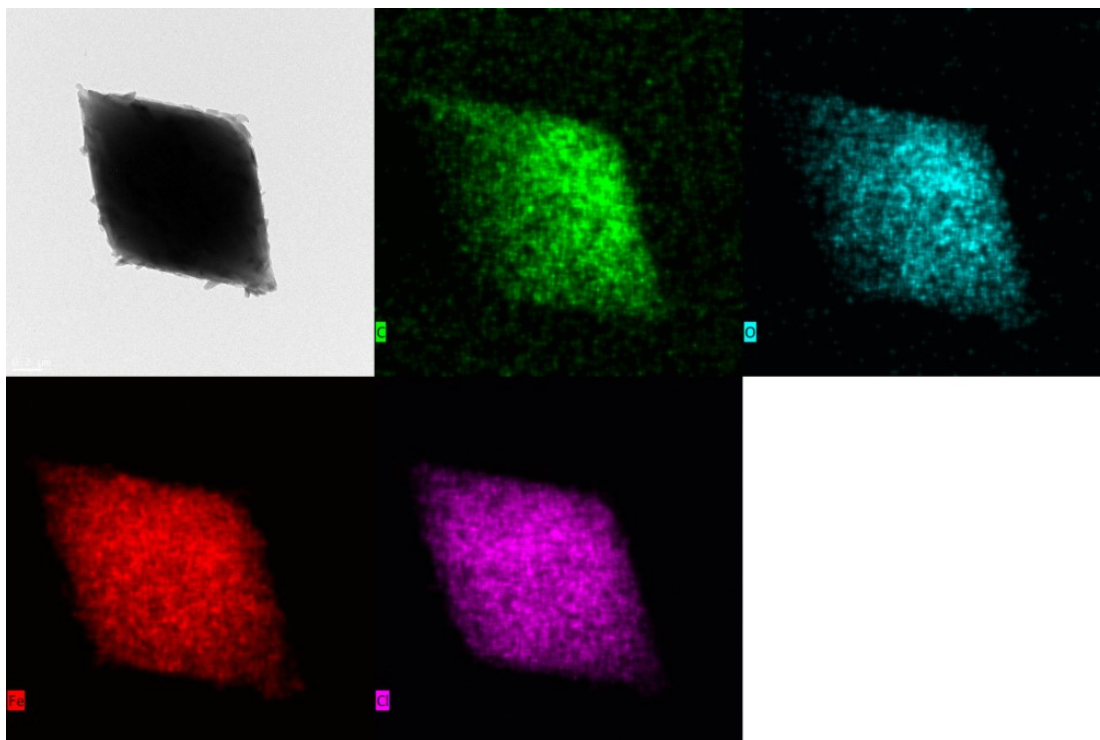

Fig.S1 TEM images and EDS spectrum of prepared Fe-MOF-235.

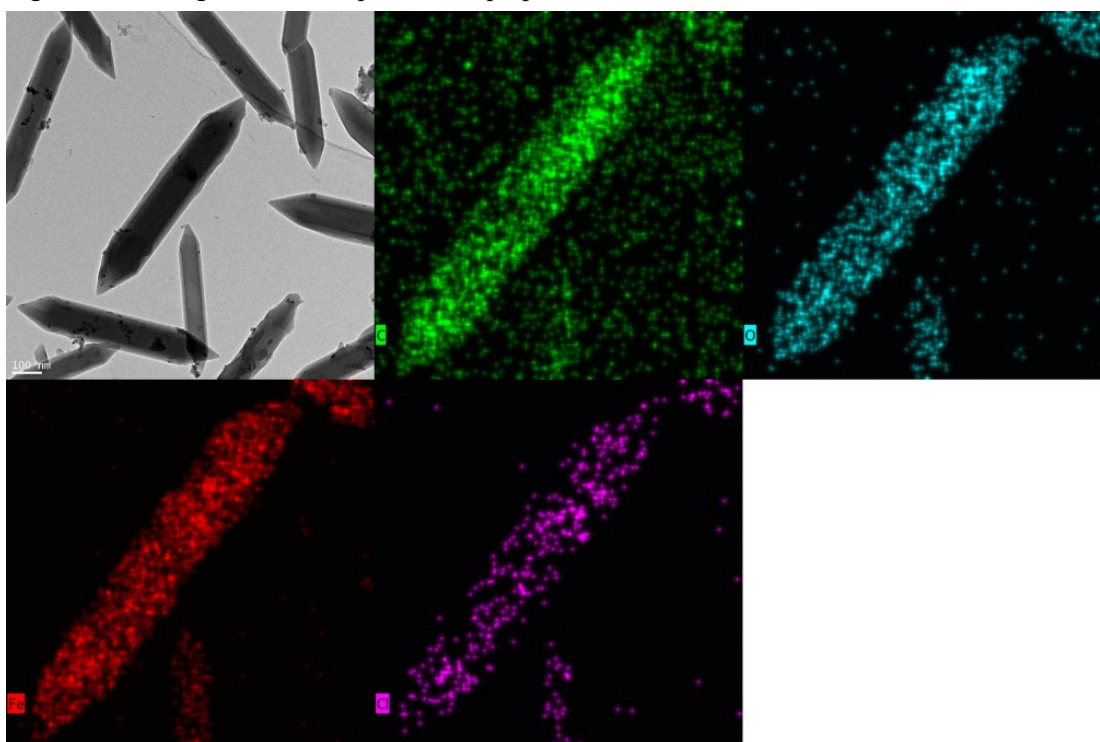

Fig.S2 TEM images and EDS spectrum of prepared Fe-MIL-88B.

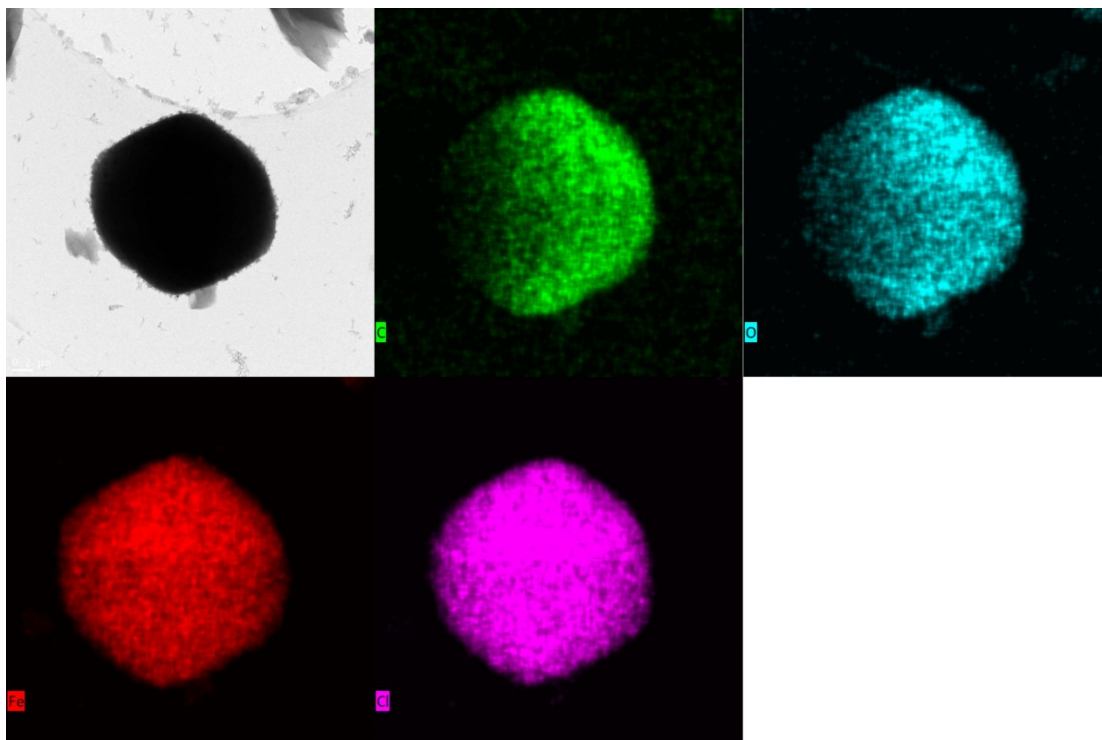

Fig.S3 TEM images and EDS spectrum of prepared Fe-MIL-53.

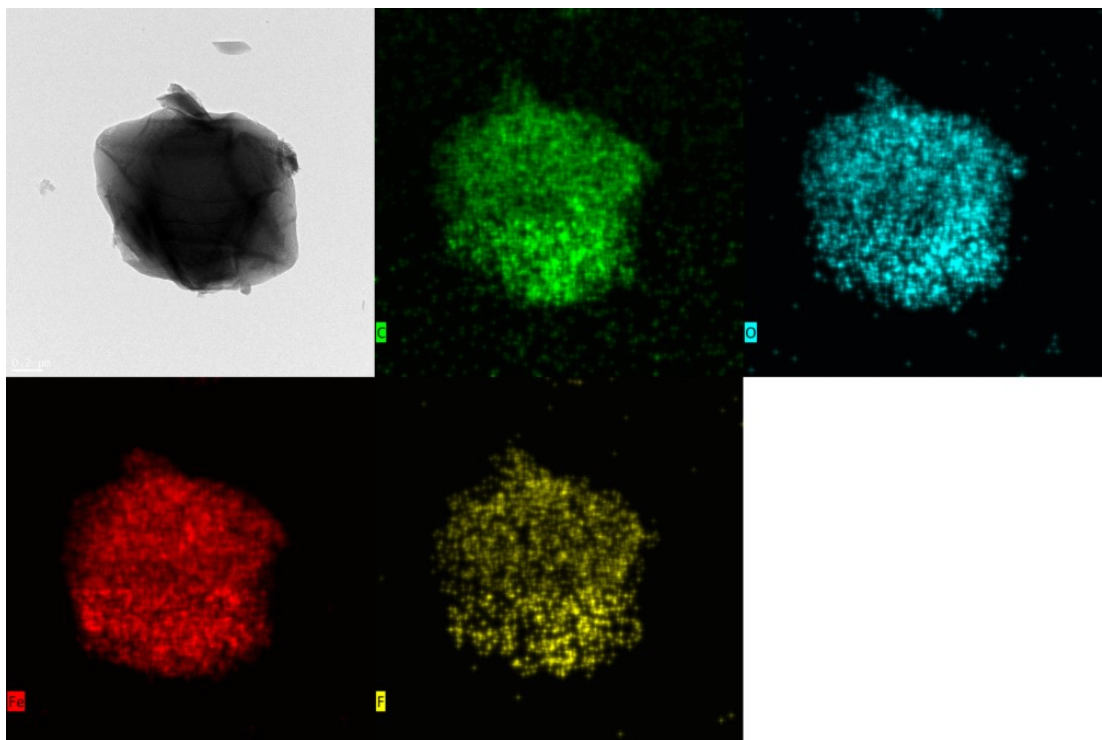

Fig.S4 TEM images and EDS spectrum of prepared Fe-MIL-68.

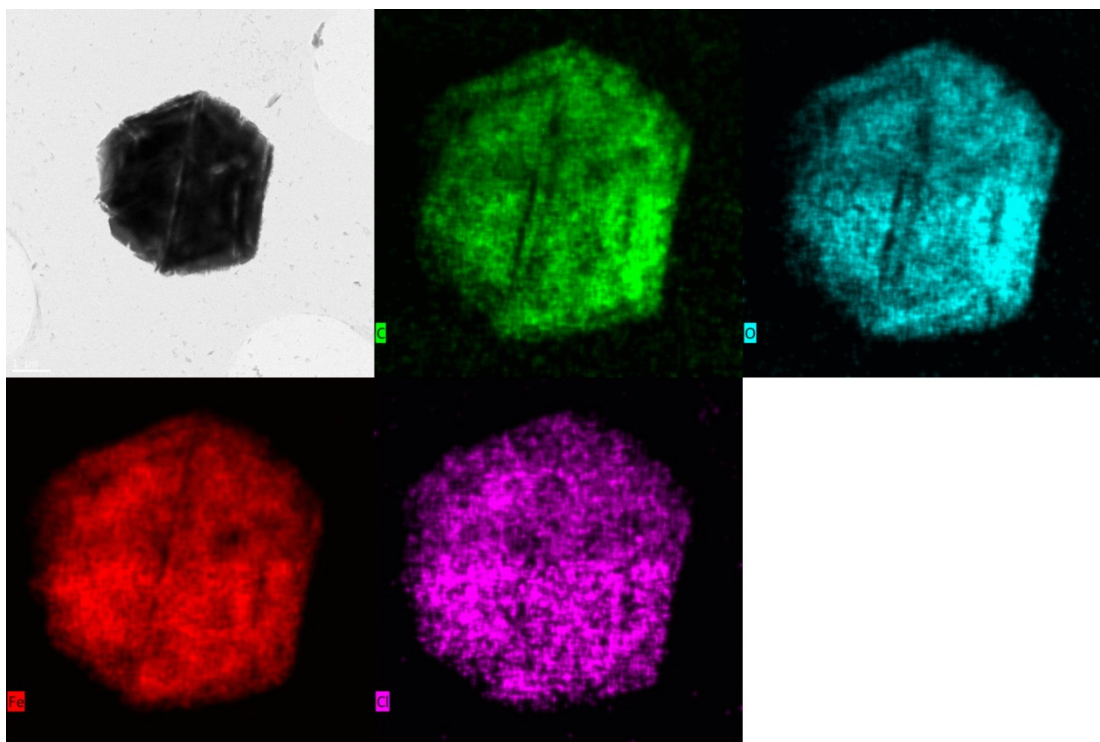

Fig.S5 TEM images and EDS spectrum of prepared Fe-MIL-101.

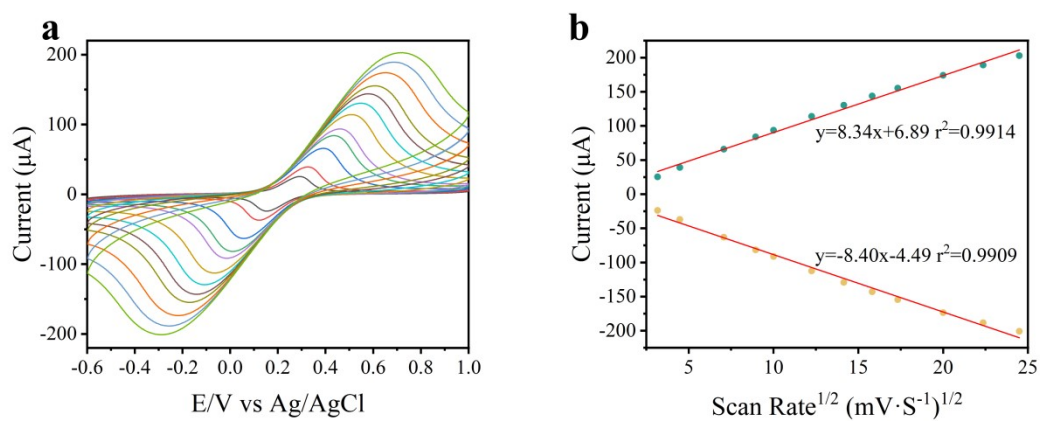

Fig.S6 CV curves of different scan rate values in the range of 10–600  $\text{mV}\cdot\text{s}^{-1}$ (a) and the Linear relationship of  $I_{pa}$  and  $\sqrt{v}$  of bare CGE.

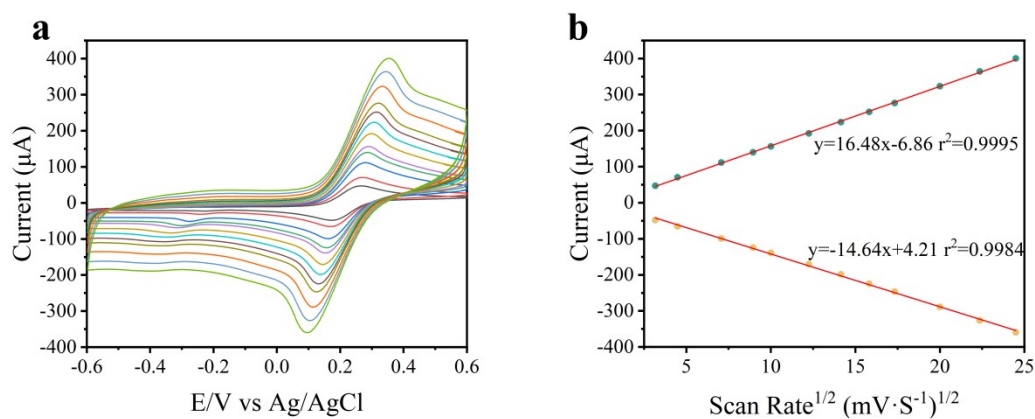

Fig.S7 CV curves of different scan rate values in the range of 10–600  $\text{mV}\cdot\text{s}^{-1}$ (a) and the Linear

relationship of  $I_{pa}$  and  $\sqrt{v}$  of MWCNTs/CGE.

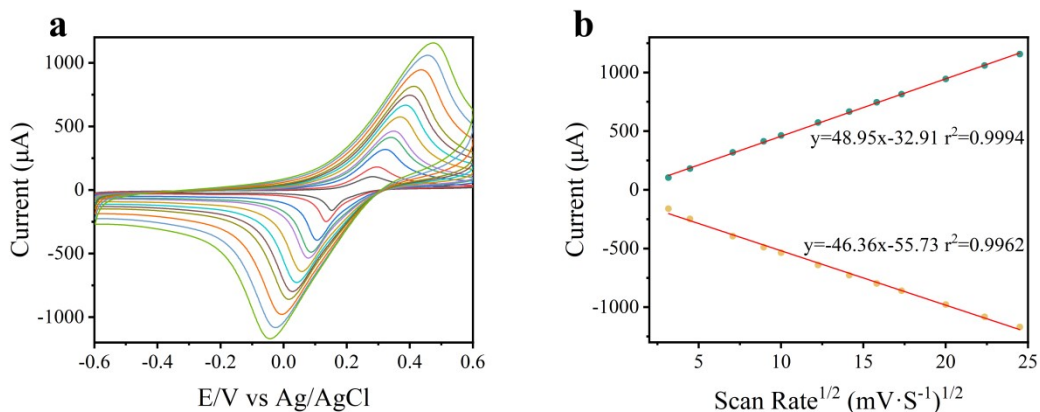

Fig.S8 CV curves of different scan rate values in the range of  $10\text{--}600 \text{ mV}\cdot\text{s}^{-1}$  (a) and the Linear relationship of  $I_{pa}$  and  $\sqrt{v}$  of Fe-MOF235/MWCNTs/CGE.

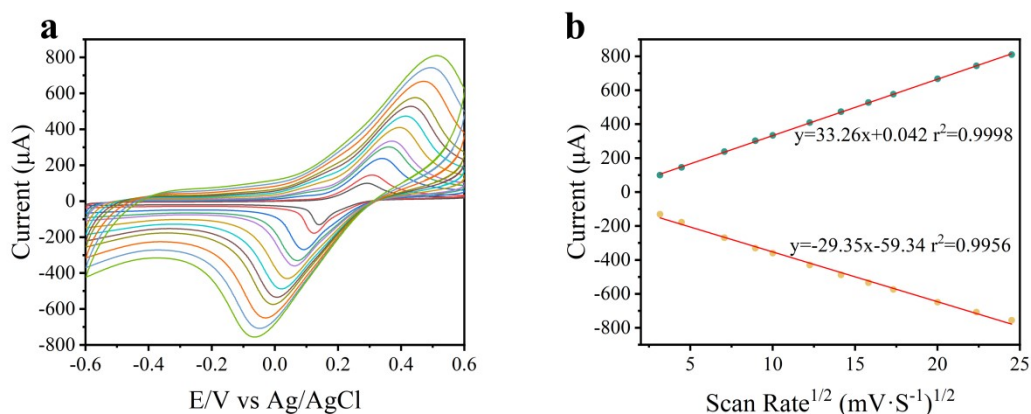

Fig.S9 CV curves of different scan rate values in the range of  $10\text{--}600 \text{ mV}\cdot\text{s}^{-1}$  (a) and the Linear relationship of  $I_{pa}$  and  $\sqrt{v}$  of Fe-MIL-88B/MWCNTs/CGE.

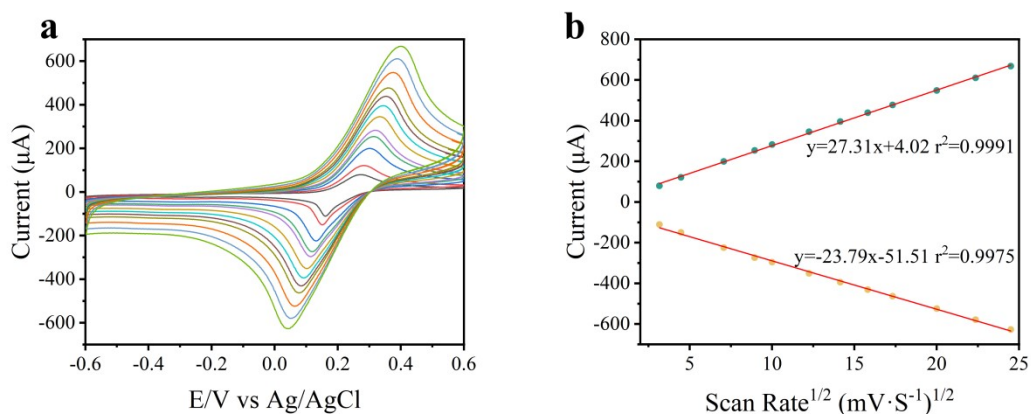

Fig.S10 CV curves of different scan rate values in the range of  $10\text{--}600 \text{ mV}\cdot\text{s}^{-1}$  (a) and the Linear relationship of  $I_{pa}$  and  $\sqrt{v}$  of Fe-MIL-53/MWCNTs/CGE.

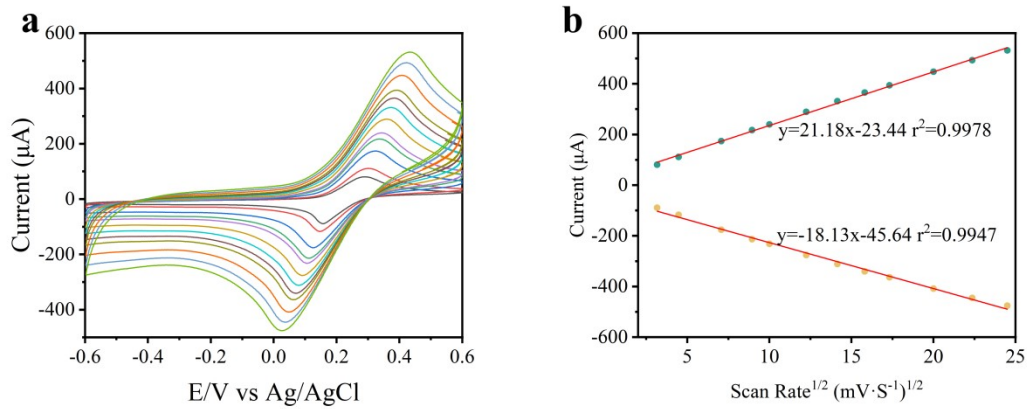

Fig.S11 CV curves of different scan rate values in the range of 10–600  $\text{mV}\cdot\text{s}^{-1}$ (a) and the Linear relationship of  $I_{pa}$  and  $\sqrt{v}$  of Fe-MIL-68/MWCNTs/CGE.

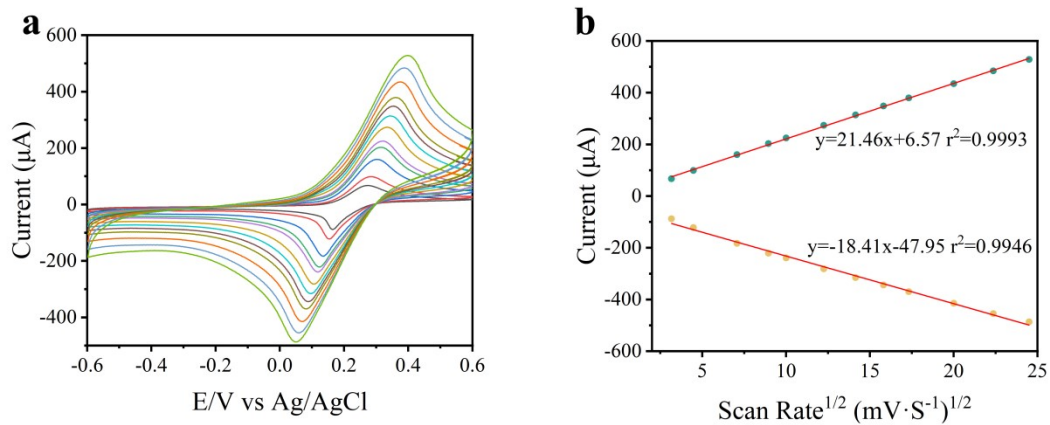

Fig.S12 CV curves of different scan rate values in the range of 10–600  $\text{mV}\cdot\text{s}^{-1}$ (a) and the Linear relationship of  $I_{pa}$  and  $\sqrt{v}$  of Fe-MIL-101/MWCNTs/CGE.

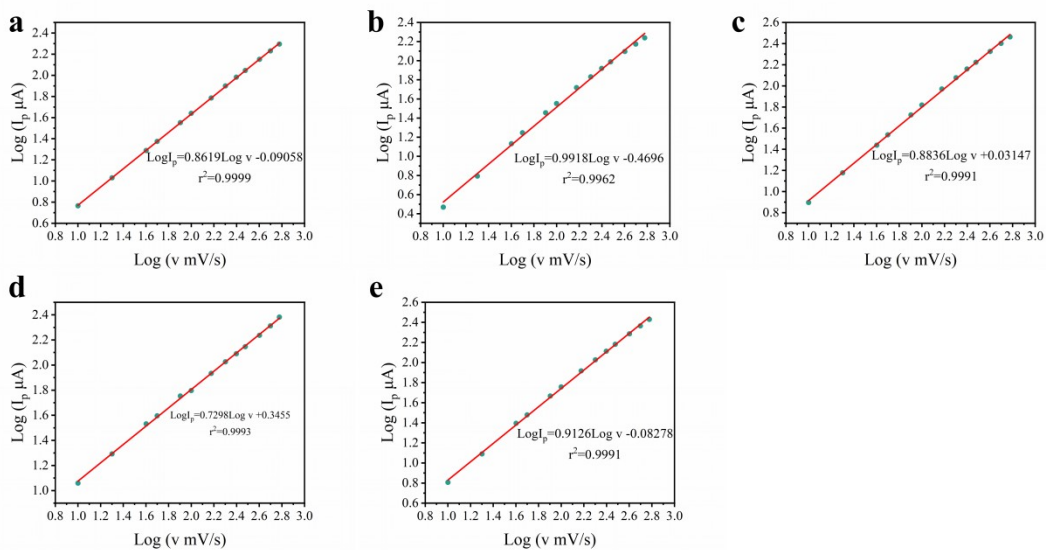

Fig.S13 The Linear relationship of  $\text{Log } I_{pa}$  and  $\text{Log } v$  of, Fe-MOF-235/MWCNTs(a), Fe-MIL-88B/MWCNTs(b), Fe-MIL-53/MWCNTs(c), Fe-MIL-68/MWCNTs(d), Fe-MIL-101/MWCNTs(e).

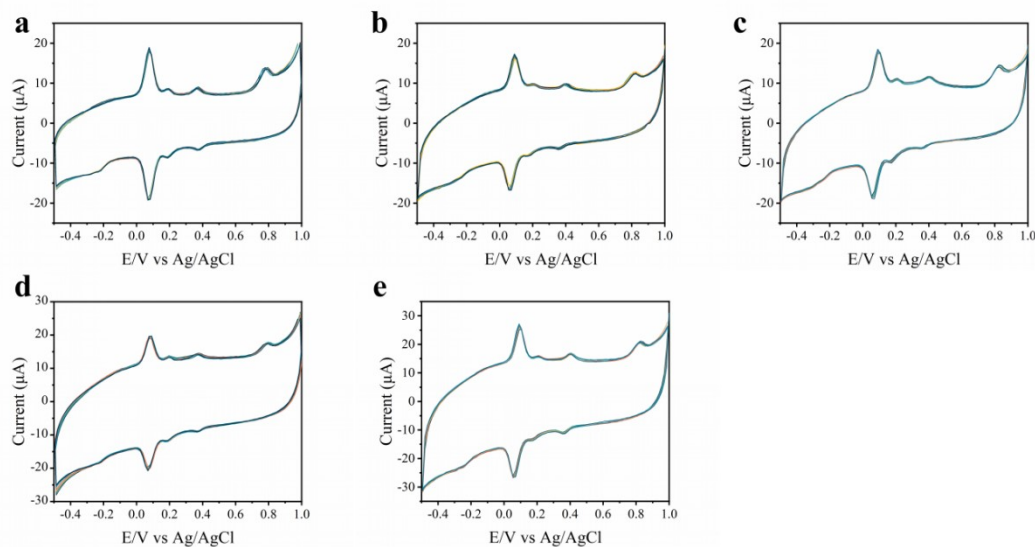

Fig.S14 CV curves of fentanyl recorded by Fe-MOF-235/MWCNTs(a) ,Fe-MIL-88B/MWCNTs(b) ,Fe-MIL-53/MWCNTs(c) ,Fe-MIL-68/MWCNTs(d) ,Fe-MIL-101/MWCNTs(e) repeated for 10 times using a single modified GCE .

## Reference

- [1] Wang, Q.; Astruc, D., State of the Art and Prospects in Metal-Organic Framework (MOF)-Based and MOF-Derived Nanocatalysis. *Chemical Reviews* 2020, 120 (2), 1438-1511.
- [2] Yu, X. Y.; Feng, Y.; Guan, B. Y.; Lou, X. W.; Paik, U., Carbon coated porous nickel phosphides nanoplates for highly efficient oxygen evolution reaction. *Energy & Environmental Science* 2016, 9 (4), 1246-1250.
- [3] Yan, L. T.; Cao, L.; Dai, P. C.; Gu, X.; Liu, D. D.; Li, L. J.; Wang, Y.; Zhao, X. B., Metal-Organic Frameworks Derived Nanotube of Nickel-Cobalt Bimetal Phosphides as Highly Efficient Electrocatalysts for Overall Water Splitting. *Advanced Functional Materials* 2017, 27 (40).
- [4] Zhao, S. L.; Wang, Y.; Dong, J. C.; He, C. T.; Yin, H. J.; An, P. F.; Zhao, K.; Zhang, X. F.; Gao, C.; Zhang, L. J.; Lv, J. W.; Wang, J. X.; Zhang, J. Q.; Khattak, A. M.; Khan, N. A.; Wei, Z. X.; Zhang, J.; Liu, S. Q.; Zhao, H. J.; Tang, Z. Y., Ultrathin metal-organic framework nanosheets for electrocatalytic oxygen evolution. *Nature Energy* 2016, 1, 1-10.
- [5] Jahan, M.; Liu, Z. L.; Loh, K. P., A Graphene Oxide and Copper-Centered Metal Organic Framework Composite as a Tri-Functional Catalyst for HER, OER, and ORR. *Advanced Functional Materials* 2013, 23 (43), 5363-5372.
